RETRACTION

# Retraction: Nexus between energy efficiency, green investment, urbanization and environmental quality: Evidence from MENA region

The *PLOS One* Editors

The *PLOS One* Editors retract this article [1] due to concerns about potential manipulation of the publication process. These concerns call into question the validity and provenance of the reported results. We regret that the issues were not identified prior to the article's publication.

MQ did not agree with the retraction. CG and HS either did not respond directly or could not be reached.

## Reference

1. Gang C, Sha H, Qamruzzaman M. Nexus between energy efficiency, green investment, urbanization and environmental quality: Evidence from MENA region. *PLoS ONE*. 2023;18(12):e0295628. <https://doi.org/10.1371/journal.pone.0295628> PMID: [38157360](https://pubmed.ncbi.nlm.nih.gov/38157360/)

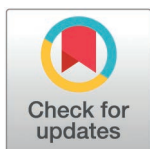

## OPEN ACCESS

**Citation:** The *PLOS One* Editors (2025) Retraction: Nexus between energy efficiency, green investment, urbanization and environmental quality: Evidence from MENA region. *PLoS ONE* 20(5): e0323298. <https://doi.org/10.1371/journal.pone.0323298>

**Published:** May 7, 2025

**Copyright:** © 2025 The *PLOS One* Editors. This is an open access article distributed under the terms of the [Creative Commons Attribution License](https://creativecommons.org/licenses/by/4.0/), which permits unrestricted use, distribution, and reproduction in any medium, provided the original author and source are credited.
